# Supplementary material for: Importance of moderate-to-vigorous physical activity during the COVID-19 pandemic: a systematic review and meta-analysis
Source: publisher site journal article supplement (doi:10.1515/jbcpp-2023-0040), 2023-03-23
Supplement: Supplementary file 1 [file j_jbcpp-2023-0040_suppl_001.docx]

**SUPPLEMENTARY MATERIALS**

Table S1. The assessments of study quality using Newcastle-Ottawa Scale (NOS).

| **NOS of Cohort Study** | | | | | |
| --- | --- | --- | --- | --- | --- |
| **Components** | Ahmadi et al. (2021) | Hamer et al. (2020) | Zhang et al. (2020) | Lee et al. (2021) | Sallis et al. (2021) |
| **Selection** | | | | | |
| Representativeness of the exposed cohort | * | * | * | * | * |
| Selection of the non-exposed cohort | * | * | * | * | * |
| Ascertainment of exposure | * | * | * | * | * |
| Demonstration that outcome of interest was not present at start of the study | * | * | * | * | * |
| **Comparability** | | | | | |
| Comparability of cohorts on the basis of design or analysis | * | * | ** | ** | ** |
| **Exposure** | | | | | |
| Assessment of outcome | * | * | * | * | * |
| Enough follow-up time length for outcome to occur | * | * | * | * | * |
| Adequacy of follow-up of cohorts | * | * | * | * | * |
| **Study Quality** | | | | | |
| **Total Score** | 8 | 8 | 9 | 9 | 9 |
| **Interpretation** | Good | Good | Good | Good | Good |

**Table S1 (cont.).** The assessments of study quality using Newcastle-Ottawa Scale (NOS).

| **NOS of Case-Control Study** | | **NOS of Cross-Sectional Study** | | |
| --- | --- | --- | --- | --- |
| **Components** | Cho et al. (2021) | **Components** | de Souza et al. (2021) | Tavakol et al. (2021) |
| **Selection** | | **Selection** | | |
| Is the case definition adequate? | * | Representativeness of the sample | * | * |
| Representativeness of the cases | * | Sample size | * | * |
| Selection of controls | * | Non-respondents | * | * |
| Definition of controls | 0 | Ascertainment of exposure | ** | * |
| **Comparability** | | **Comparability** | | |
| Comparability of cases and controls on the basis of the design or analysis | ** | Comparability of subjects in different outcome groups on the basis of design or analysis | * | ** |
| **Exposure** | | **Exposure** | | |
| Ascertainment of exposure | * | Assessment of outcome | ** | * |
| Same method of ascertainment for cases and controls | * | Statistical test | * | * |
| Non-response rate | * |
| **Study Quality** | | **Study Quality** | | |
| **Total Score** | 8 | **Total Score** | 9 | 8 |
| **Interpretation** | Good | **Interpretation** | Very good | Very good |
